# Supplementary material for: TGF-β-driven downregulation of the Wnt/β-Catenin transcription factor TCF7L2/TCF4 in PDGFRα+ fibroblasts
Source: bioRxiv or medRxiv preprint supplement (doi:10.1101/2020.01.05.895334), 2020-04-01
Supplement: Supplementary file [file media-1.pdf]

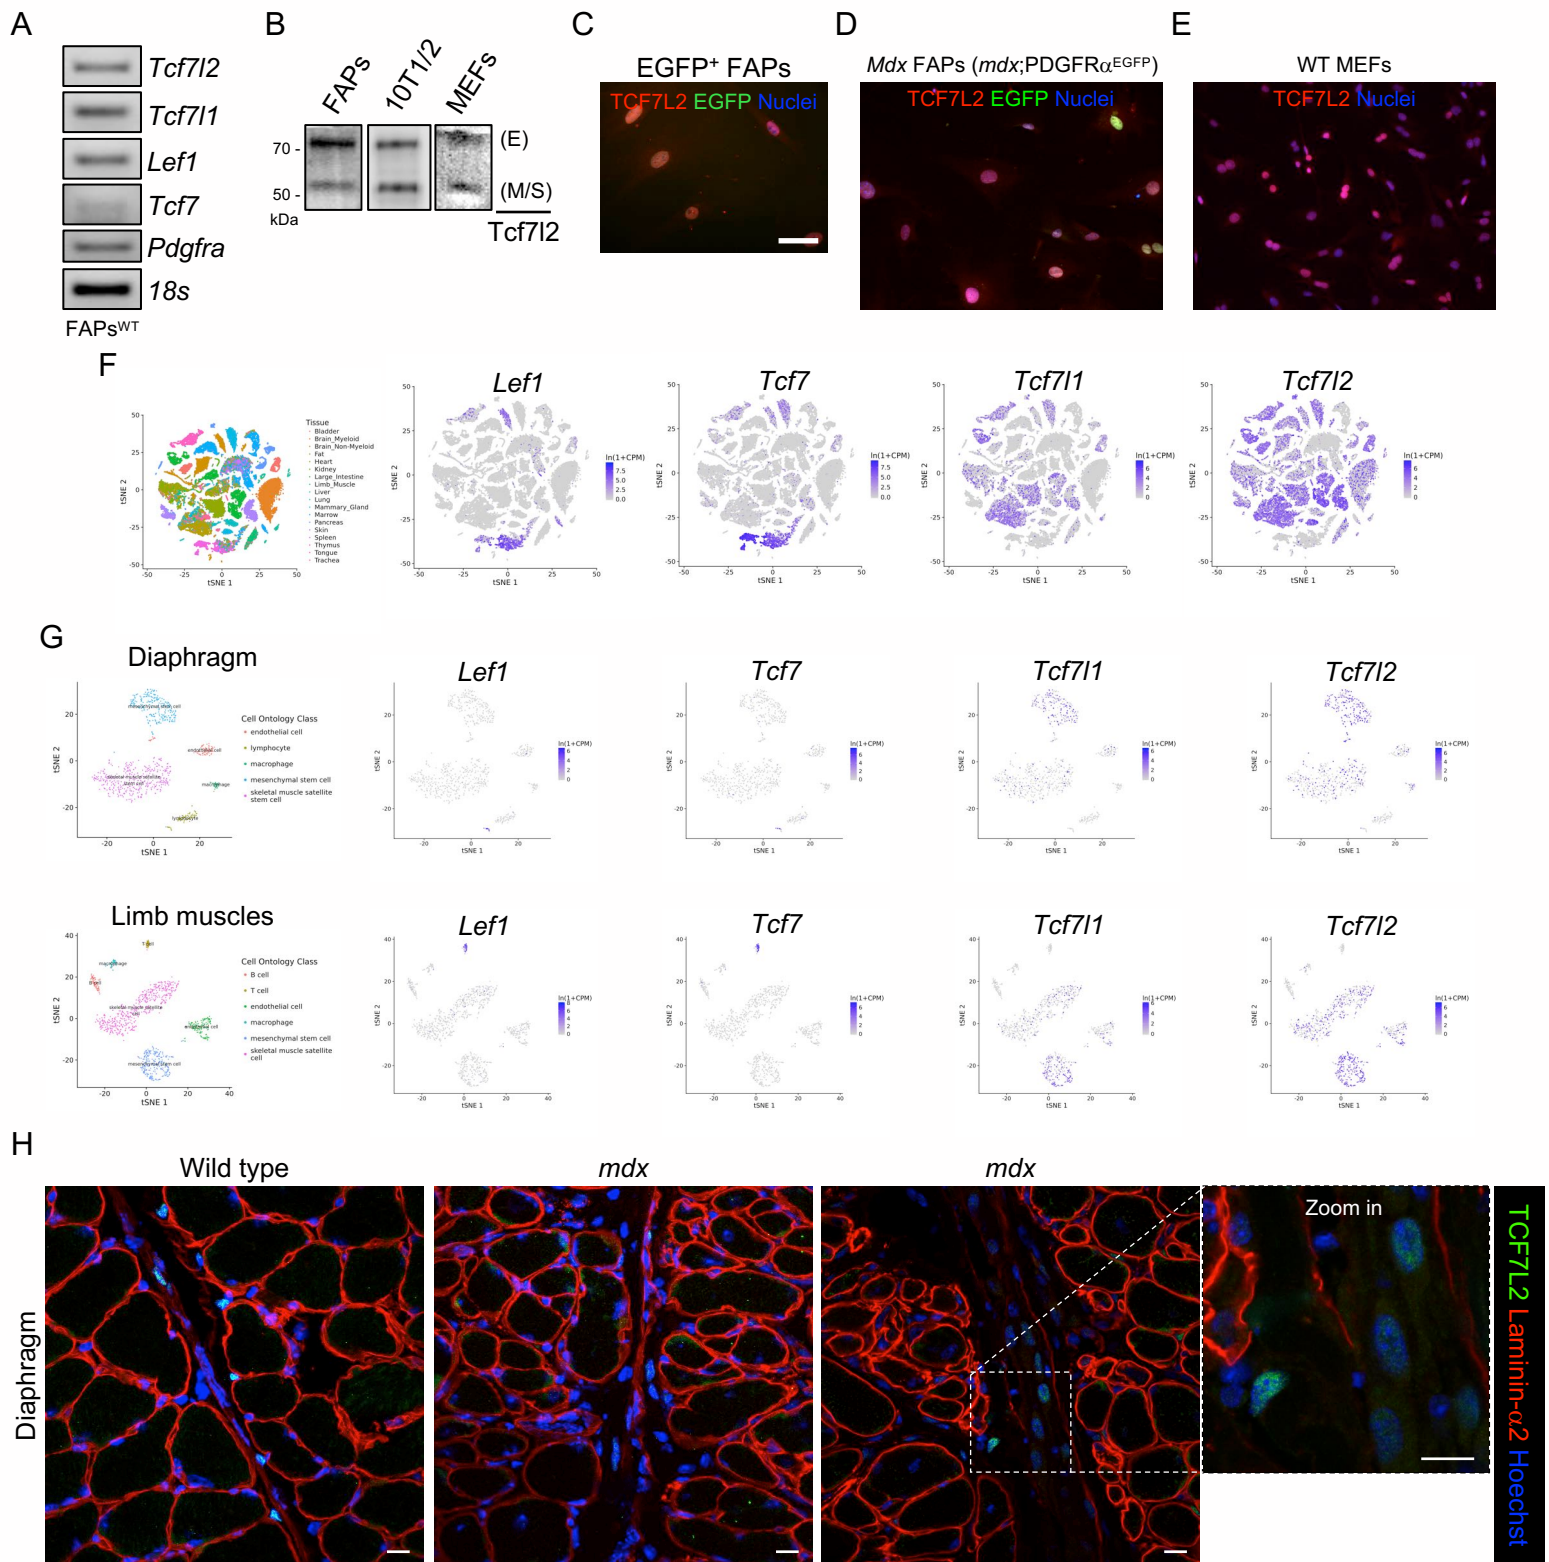

**Fig. S1. Gene expression of Tcf/Lef family members in mesenchymal stromal cells.**

(A) Gene expression of Tcf/Lef family members was analyzed by RT-qPCR in a 2% agarose gel. (B) Representative western blot analysis showing TCF7L2 protein levels in EGFP<sup>+</sup> FAPs, C3H 10T1/2 MSCs, and MEFs. TCF7L2 “E” and “M/S” isoforms are shown. (C-E) Immunofluorescence of TCF7L2 in isolated skeletal muscle PDGFR $\alpha$ -EGFP<sup>+</sup> FAPs (C), *mdx* FAPs (D), and MEFs (E). Scale bar: 50  $\mu$ m. TCF7L2 immunofluorescence (red) in MEFs. (F) A t-SNE plot of all cells collected by the microfluidic-droplet method, colored by the predominant cell type that composes each cluster. Cells were colored by cell type for diaphragm and limb muscles and visualized with t-SNE. Cell types were determined by differential gene expression of known markers between clusters. t-SNE visualization of *Tcf/Lef* genes (from grey, low expression, to blue, high expression). (H) Z-stack confocal images showing the localization of TCF7L2<sup>+</sup> cells in diaphragm muscle sections of adult wild-type and from the dystrophic *mdx* mice. Scale bars: 10  $\mu$ m.

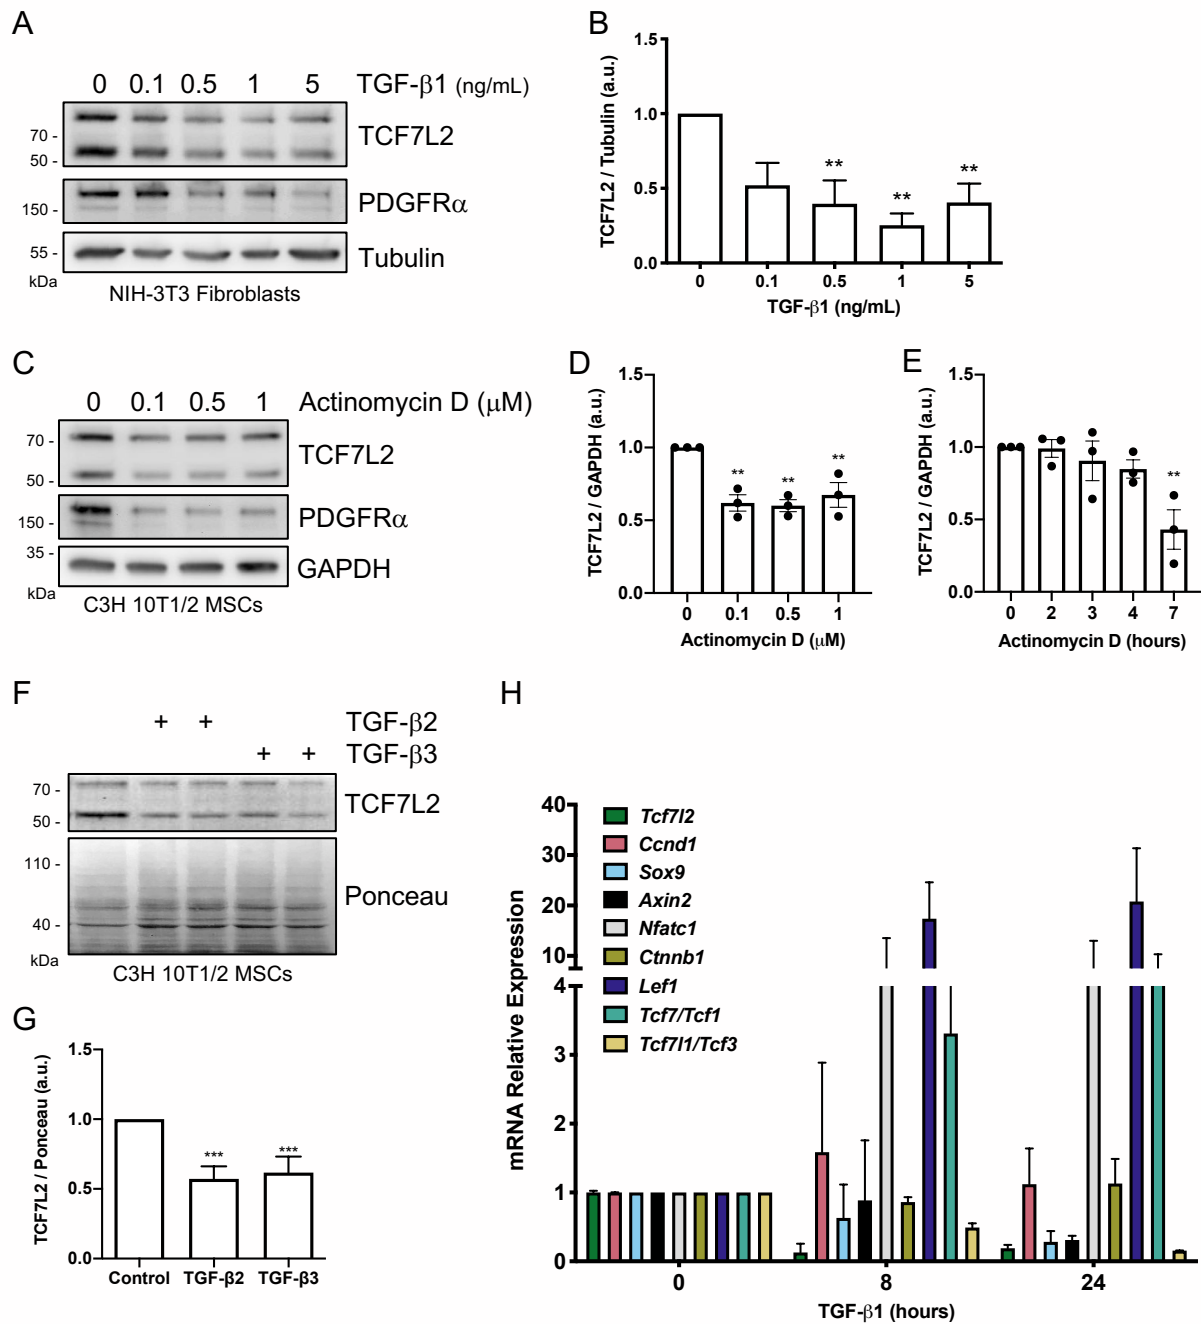

**Fig. S2. Extracellular TGF- $\beta$  ligands impair TCF7L2 expression and TCF7L2-mediated target gene expression.**

(A) Representative western blot analysis showing TCF7L2 and PDGFR $\alpha$  expression levels in NIH-3T3 fibroblasts after treatment with different concentrations of TGF- $\beta$ 1 for 24 h. GAPDH was used as the loading control. (B) Quantification of TCF7L2 protein expression.  $**P < 0.005$  by one-way ANOVA with Dunnett's post-test;  $n = 4$ . (C) Representative western blot analysis showing TCF7L2 and PDGFR $\alpha$  expression levels in MSCs after treatment with different concentrations of actinomycin D for 7 h. GAPDH was used as the loading control. (D,E) Quantification of TCF7L2 protein expression.  $**P < 0.005$  by one-way ANOVA with Dunnett's post-test;  $n = 3$ . (F) Representative western blot from three independent experiments, showing TCF7L2 protein levels after stimulation with TGF- $\beta$ 2 and TGF- $\beta$ 3 for 24 h (5 ng/ml) in MSCs. Ponceau was used as the loading control. (G) Quantification of TCF7L2 protein expression  $***P < 0.001$ ; One-Way ANOVA with Dunnett post-test;  $n = 3$ . (H) *Tcf4* (*Tcf7l2*), *Ccnd1* (CyclinD1), *Sox9*, *Axin2*, *Nfatc1*, *Ctnnb1* ( $\beta$ -catenin), *Lef1*, *Tcf7* (*Tcf1*), and *Tcf7l1* (*Tcf3*) mRNA expression levels were analyzed by quantitative PCR in TGF- $\beta$ 1-treated MSCs at different time points (0, 8, 24 h).  $n = 3$ .

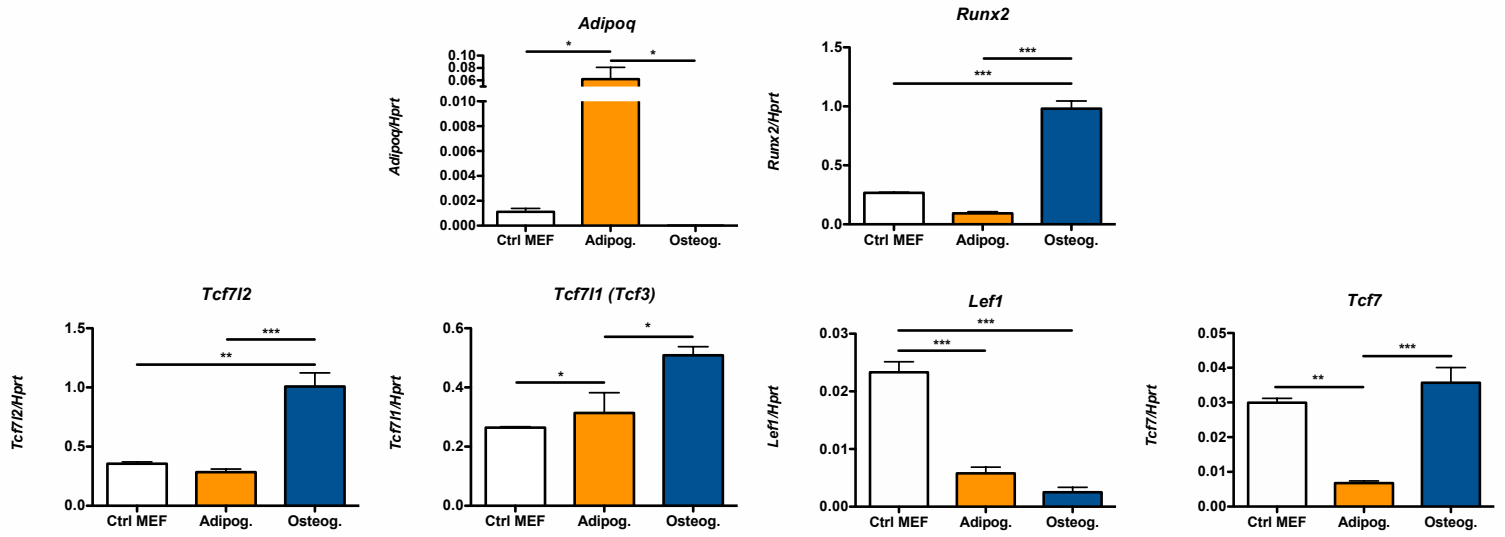

**Fig. S3. Tcf/Lef members gene expression varies in *in vitro* adipocytes and osteocytes from MEFs.**

*Adipoq*, *Runx2*, *Tcf712*, *Tcf711*, *Lef1*, and *Tcf7* mRNA expression levels were analyzed by digital droplet RT-qPCR in MEFs control (Ctrl MEF), MEFs-derived adipocytes (Adipog.: adipogenic cell medium), and MEFs-derived osteocytes (Osteog.: osteogenic cell medium).

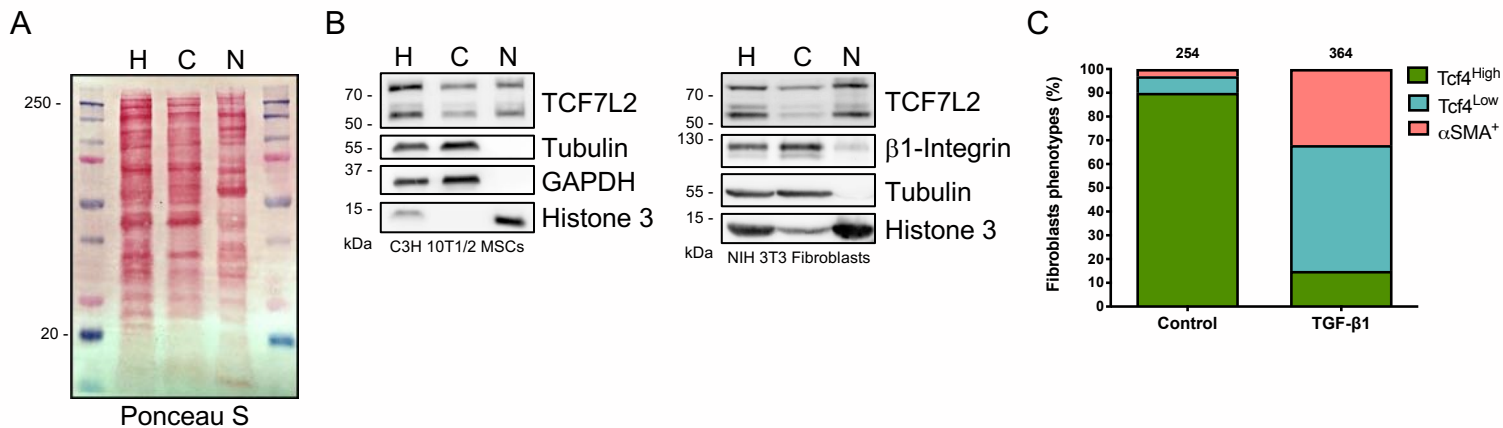

**Fig. S4. Nuclear-cytoplasmic fractionation of MSCs and evaluation of TCF7L2 protein expression.**

(A) Representative ponceau red staining of H: Whole cell lysate; C: Cytoplasmic lysate; N: Nuclei lysate. (B) Representative western blot analysis showing TCF7L2, Tubulin, GAPDH, Histone 3, and  $\beta$ 1-Integrin protein levels in proliferating C3H/10T1/2 MSCs and NIH-3T3 fibroblasts. (C) Quantification of TCF7L2 fluorescence intensity in control- and TGF- $\beta$ 1-treated fibroblasts. TCF7L2<sup>Hi</sup> (Tcf4<sup>Hi</sup>), TCF7L2<sup>Low</sup> (Tcf4<sup>Low</sup>), and  $\alpha$ SMA<sup>+</sup>-phenotypes were quantified in control and TGF- $\beta$ 1-stimulated C3H/10T1/2 MPCs at 36 h. The numbers above each graph show the total quantified number of cells.  $n=3$ .

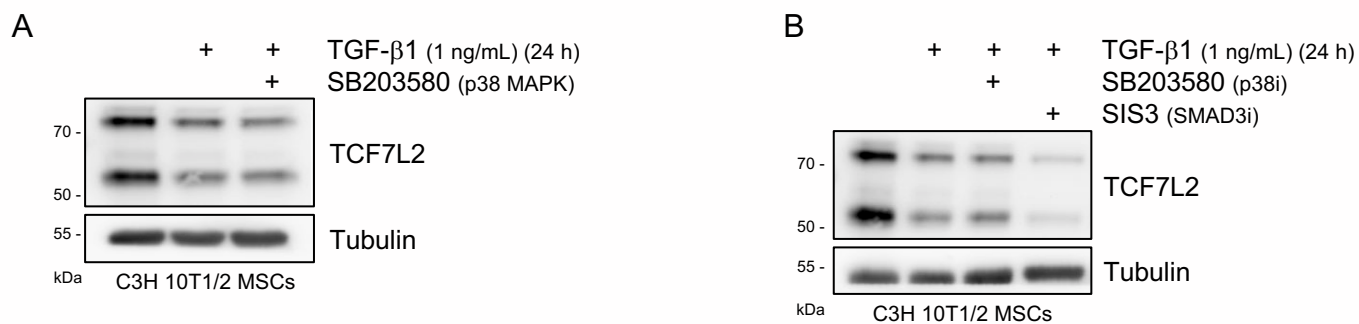

**Fig. S5. Pharmacological Smad3 inhibition with SIS3 pronounces TGF- $\beta$ -mediated downregulation of TCF7L2.**

(A) Representative western blot analysis showing TCF7L2 expression levels in C3H 10T1/2 cells after TGF- $\beta$ 1 treatment (1 ng/ml) for 24 h. SB203580 (p38 MAPK inhibitor) was co-incubated with TGF- $\beta$ 1 for 24 h. Tubulin was used as the loading control. (B) Representative western blot analysis showing TCF7L2 expression levels in C3H 10T1/2 cells after TGF- $\beta$ 1 treatment (1 ng/ml) for 24 h. SB203580 (p38 MAPK inhibitor) or SIS3 (Smad3 inhibitor) were co-incubated with TGF- $\beta$ 1 for 24 h. Tubulin was used as the loading control.

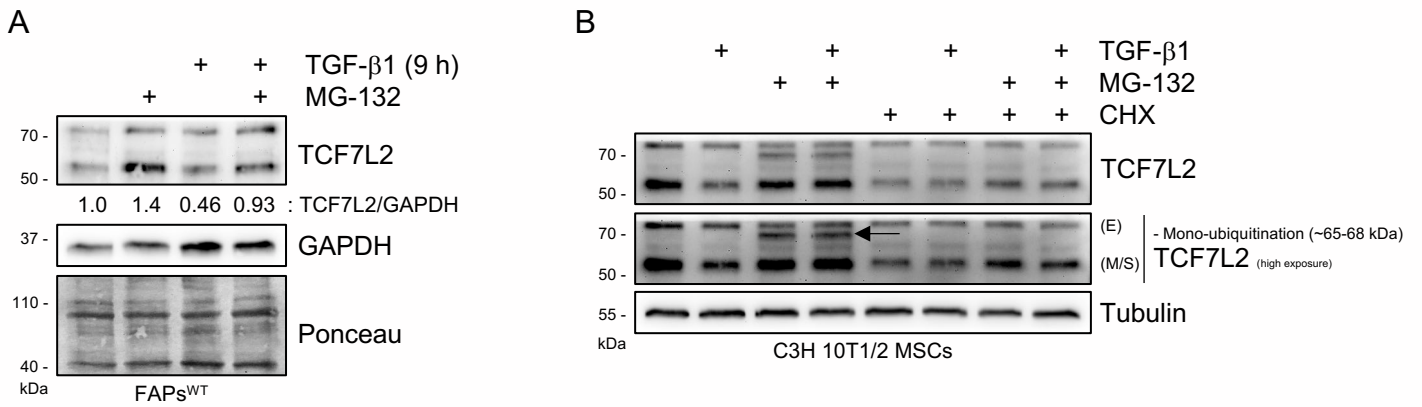

**Fig. S6. Evaluation of the participation of the ubiquitin proteasome system via MG132 inhibition on the regulation of TCF7L2 protein expression.**

(A) Representative western blot analysis showing TCF7L2 expression levels in C3H 10T1/2 cells after TGF-β1 treatment (5 ng/ml) for 9 h. MG132 (26S subunit proteasome inhibitor) was incubated alone or co-incubated with TGF-β1 for 9 h. GAPDH and ponceau red were used as the loading control. (B) Representative western blot analysis showing TCF7L2 expression levels in C3H 10T1/2 cells after TGF-β1 treatment (5 ng/ml) for 9 h. MG132 (26S subunit proteasome inhibitor) or cycloheximide (protein translation inhibitor) were incubated alone or co-incubated with TGF-β1 for 9 h. Tubulin was used as the loading control.

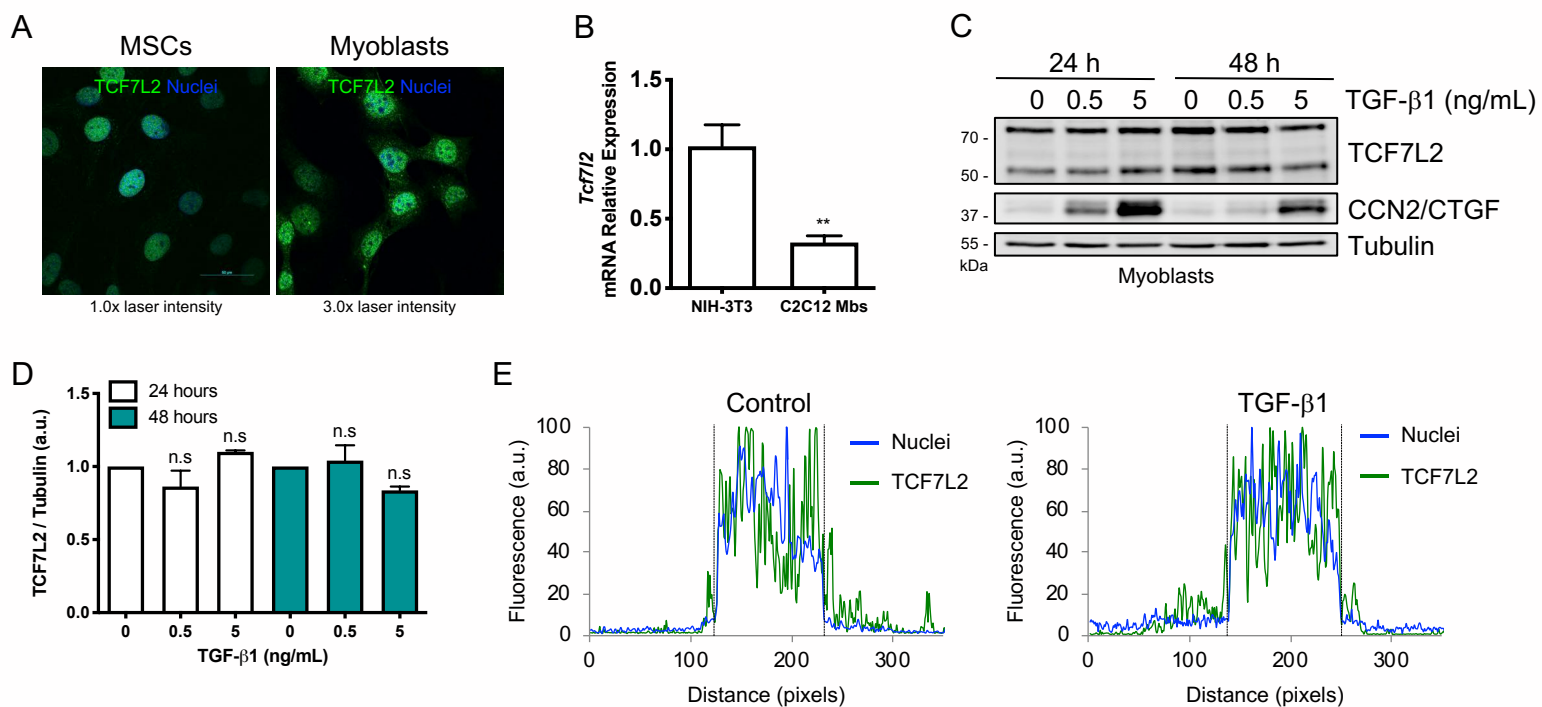

**Fig. S7. The expression of TCF7L2 is not affected by TGF- $\beta$  signaling in C2C12 myoblasts.**

(A) Confocal images showing TCF7L2 localization in C3H/10T1/2 MSCs and C2C12 myoblasts cell types. Nuclei were stained with Hoechst (*blue*). Laser intensities (low vs high) were manually adjusted to show similar TCF7L2 fluorescence intensities in both cell types. (B) *Tcf7l2* mRNA expression levels were analyzed by quantitative PCR in proliferating NIH-3T3 fibroblasts and C2C12 myoblasts.  $**P < 0.005$  by two-tailed Student's t-test.  $n=3$ . (C) Representative western blot analysis of three independent experiments, showing TCF7L2 and CCN2/CTGF protein levels in TGF- $\beta$ 1-treated C2C12 myoblasts at different concentrations for 24 or 48 h. Tubulin was used as the loading control. (D) Quantification of TCF7L2 protein levels. n.s., not significant by one-way ANOVA with Dunnett's post-test;  $n=3$ . (E) Label-distribution graph showing the fluorescence intensity of TCF7L2 and Hoechst along the cell axis. Distance is shown in pixels. Dotted lines show the nucleus-cytoplasm boundary. (a.u.: arbitrary units).
